# Supplementary material for: Vaccination Coverage for Routine Vaccines and Herd Immunity Levels against Measles and Pertussis in the World in 2019
Source: PubMed Central journal article supplement (PMC7999208; doi:10.3390/vaccines9030256), 2021-03-13
Supplement: vaccines-09-00256-s001.pdf [file vaccines-09-00256-s001.pdf]

Table S1: Measles vaccination coverage and measles protection in countries of the world in 2019: 1) Vaccination coverage with the second dose of measles containing vaccine (MCV2) in 2019 and the first dose of measles containing vaccine (MCV1) in 2017; 2) vaccination coverage with one and two doses of measles vaccine in the target vaccination population; 3) measles protection in terms of prevalence of individuals with vaccine-induced measles protection in the target vaccination population; and 4) vaccination coverage with one or two doses of measles vaccine

| Region | Country name                | Vaccination coverage (%) |                     | Vaccination coverage (%) |        | Measles Protection (%) | Vaccination coverage (%) with one or two doses of measles vaccine |
|--------|-----------------------------|--------------------------|---------------------|--------------------------|--------|------------------------|-------------------------------------------------------------------|
|        |                             | MCV2 vaccine (2019)      | MCV1 vaccine (2017) | 2 doses                  | 1 dose |                        |                                                                   |
| AFR    | Seychelles                  | 99.0                     | 99.0                | 98.0                     | 2.0    | 94.9                   | 100.0                                                             |
| AFR    | Mauritius                   | 99.0                     | 89.0                | 88.1                     | 11.8   | 94.5                   | 99.9                                                              |
| AFR    | Eritrea                     | 88.0                     | 99.0                | 87.1                     | 12.8   | 94.5                   | 99.9                                                              |
| AFR    | Rwanda                      | 92.0                     | 97.0                | 89.2                     | 10.5   | 94.5                   | 99.8                                                              |
| AFR    | Cabo Verde                  | 91.0                     | 96.0                | 87.4                     | 12.3   | 94.3                   | 99.6                                                              |
| AFR    | Ghana                       | 83.0                     | 95.0                | 78.9                     | 20.3   | 93.6                   | 99.2                                                              |
| AFR    | Botswana                    | 76.0                     | 97.0                | 73.7                     | 25.6   | 93.5                   | 99.3                                                              |
| AFR    | Zambia                      | 66.0                     | 96.0                | 63.4                     | 35.3   | 92.6                   | 98.6                                                              |
| AFR    | Lesotho                     | 82.0                     | 90.0                | 73.8                     | 24.4   | 92.6                   | 98.2                                                              |
| AFR    | Sao Tome and Principe       | 81.0                     | 90.0                | 72.9                     | 25.2   | 92.4                   | 98.1                                                              |
| AFR    | Mozambique                  | 85.0                     | 87.0                | 74.0                     | 24.1   | 92.4                   | 98.1                                                              |
| AFR    | Burundi                     | 80.0                     | 90.0                | 72.0                     | 26.0   | 92.3                   | 98.0                                                              |
| AFR    | Senegal                     | 78.0                     | 90.0                | 70.2                     | 27.6   | 92.1                   | 97.8                                                              |
| AFR    | Zimbabwe                    | 75.0                     | 90.0                | 67.5                     | 30.0   | 91.7                   | 97.5                                                              |
| AFR    | Algeria                     | 77.0                     | 88.0                | 67.8                     | 29.5   | 91.5                   | 97.2                                                              |
| AFR    | Eswatini                    | 75.0                     | 89.0                | 66.8                     | 30.5   | 91.5                   | 97.3                                                              |
| AFR    | United Republic of Tanzania | 72.0                     | 90.0                | 64.8                     | 32.4   | 91.4                   | 97.2                                                              |
| AFR    | Burkina Faso                | 71.0                     | 88.0                | 62.5                     | 34.0   | 90.7                   | 96.5                                                              |
| AFR    | Gambia                      | 61.0                     | 90.0                | 54.9                     | 41.2   | 90.1                   | 96.1                                                              |
| AFR    | Malawi                      | 75.0                     | 83.0                | 62.3                     | 33.5   | 90.0                   | 95.8                                                              |
| AFR    | Sierra Leone                | 72.0                     | 80.0                | 57.6                     | 36.8   | 88.6                   | 94.4                                                              |
| AFR    | Kenya                       | 45.0                     | 89.0                | 40.1                     | 53.9   | 87.6                   | 94.0                                                              |
| AFR    | Togo                        | 67.0                     | 77.0                | 51.6                     | 40.8   | 86.6                   | 92.4                                                              |
| AFR    | Niger                       | 58.0                     | 82.0                | 47.6                     | 44.9   | 86.5                   | 92.4                                                              |
| AFR    | Namibia                     | 56.0                     | 80.0                | 44.8                     | 46.4   | 85.2                   | 91.2                                                              |
| AFR    | Comoros                     |                          | 90.0                | 0.0                      | 90.0   | 82.8                   | 90.0                                                              |
| AFR    | Liberia                     | 13.0                     | 87.0                | 11.3                     | 77.4   | 81.9                   | 88.7                                                              |
| AFR    | South Africa                | 54.0                     | 70.0                | 37.8                     | 48.4   | 80.4                   | 86.2                                                              |
| AFR    | Guinea-Bissau               |                          | 86.0                | 0.0                      | 86.0   | 79.1                   | 86.0                                                              |
| AFR    | Uganda                      |                          | 83.0                | 0.0                      | 83.0   | 76.4                   | 83.0                                                              |
| AFR    | Mauritania                  |                          | 78.0                | 0.0                      | 78.0   | 71.8                   | 78.0                                                              |

|     |                                  |      |      |      |      |      |       |
|-----|----------------------------------|------|------|------|------|------|-------|
| AFR | Ethiopia                         | 41.0 | 59.0 | 24.2 | 51.6 | 70.5 | 75.8  |
| AFR | Congo                            | 9.0  | 70.0 | 6.3  | 66.4 | 67.1 | 72.7  |
| AFR | Mali                             | 4.0  | 70.0 | 2.8  | 68.4 | 65.6 | 71.2  |
| AFR | Benin                            |      | 70.0 | 0.0  | 70.0 | 64.4 | 70.0  |
| AFR | Côte d'Ivoire                    |      | 70.0 | 0.0  | 70.0 | 64.4 | 70.0  |
| AFR | Angola                           | 45.0 | 42.0 | 18.9 | 49.2 | 63.2 | 68.1  |
| AFR | Cameroon                         |      | 65.0 | 0.0  | 65.0 | 59.8 | 65.0  |
| AFR | Gabon                            |      | 63.0 | 0.0  | 63.0 | 58.0 | 63.0  |
| AFR | Madagascar                       |      | 60.0 | 0.0  | 60.0 | 55.2 | 60.0  |
| AFR | Nigeria                          | 9.0  | 54.0 | 4.9  | 53.3 | 53.6 | 58.1  |
| AFR | Democratic Republic of the Congo |      | 57.0 | 0.0  | 57.0 | 52.4 | 57.0  |
| AFR | Equatorial Guinea                |      | 53.0 | 0.0  | 53.0 | 48.8 | 53.0  |
| AFR | South Sudan                      |      | 50.0 | 0.0  | 50.0 | 46.0 | 50.0  |
| AFR | Central African Republic         |      | 49.0 | 0.0  | 49.0 | 45.1 | 49.0  |
| AFR | Guinea                           |      | 47.0 | 0.0  | 47.0 | 43.2 | 47.0  |
| AFR | Chad                             |      | 37.0 | 0.0  | 37.0 | 34.0 | 37.0  |
| AMR | Cuba                             | 99.0 | 99.0 | 98.0 | 2.0  | 94.9 | 100.0 |
| AMR | Nicaragua                        | 99.0 | 99.0 | 98.0 | 2.0  | 94.9 | 100.0 |
| AMR | Saint Vincent and the Grenadines | 99.0 | 99.0 | 98.0 | 2.0  | 94.9 | 100.0 |
| AMR | Uruguay                          | 99.0 | 96.0 | 95.0 | 4.9  | 94.8 | 100.0 |
| AMR | Panama                           | 97.0 | 98.0 | 95.1 | 4.9  | 94.8 | 99.9  |
| AMR | Antigua and Barbuda              | 95.0 | 99.0 | 94.1 | 5.9  | 94.8 | 100.0 |
| AMR | Guyana                           | 92.0 | 99.0 | 91.1 | 8.8  | 94.7 | 99.9  |
| AMR | Saint Kitts and Nevis            | 98.0 | 93.0 | 91.1 | 8.7  | 94.6 | 99.9  |
| AMR | Costa Rica                       | 93.0 | 96.0 | 89.3 | 10.4 | 94.4 | 99.7  |
| AMR | Jamaica                          | 92.0 | 95.0 | 87.4 | 12.2 | 94.3 | 99.6  |
| AMR | United States of America         | 95.0 | 92.0 | 87.4 | 12.2 | 94.3 | 99.6  |
| AMR | Belize                           | 95.0 | 90.0 | 85.5 | 14.0 | 94.1 | 99.5  |
| AMR | Trinidad and Tobago              | 92.0 | 93.0 | 85.6 | 13.9 | 94.1 | 99.4  |
| AMR | Chile                            | 91.0 | 93.0 | 84.6 | 14.7 | 94.0 | 99.4  |
| AMR | Honduras                         | 85.0 | 96.0 | 81.6 | 17.8 | 93.9 | 99.4  |
| AMR | Colombia                         | 88.0 | 93.0 | 81.8 | 17.3 | 93.7 | 99.2  |
| AMR | Argentina                        | 89.0 | 89.0 | 79.2 | 19.6 | 93.3 | 98.8  |
| AMR | Canada                           | 87.0 | 90.0 | 78.3 | 20.4 | 93.2 | 98.7  |
| AMR | Paraguay                         | 83.0 | 92.0 | 76.4 | 22.3 | 93.0 | 98.6  |
| AMR | Bahamas                          | 82.0 | 90.0 | 73.8 | 24.4 | 92.6 | 98.2  |
| AMR | Barbados                         | 77.0 | 92.0 | 70.8 | 27.3 | 92.4 | 98.2  |
| AMR | Dominica                         | 92.0 | 77.0 | 70.8 | 27.3 | 92.4 | 98.2  |
| AMR | El Salvador                      | 87.0 | 85.0 | 74.0 | 24.1 | 92.4 | 98.1  |
| AMR | Grenada                          | 82.0 | 85.0 | 69.7 | 27.6 | 91.6 | 97.3  |
| AMR | Guatemala                        | 78.0 | 86.0 | 67.1 | 29.8 | 91.2 | 96.9  |
| AMR | Saint Lucia                      | 75.0 | 87.0 | 65.3 | 31.5 | 91.0 | 96.8  |

|     |                      |      |      |      |      |      |       |
|-----|----------------------|------|------|------|------|------|-------|
| AMR | Brazil               | 54.0 | 91.0 | 49.1 | 46.7 | 89.7 | 95.9  |
| AMR | Ecuador              | 76.0 | 81.0 | 61.6 | 33.9 | 89.7 | 95.4  |
| AMR | Venezuela            | 13.0 | 96.0 | 12.5 | 84.0 | 89.2 | 96.5  |
| AMR | Dominican Republic   | 60.0 | 86.0 | 51.6 | 42.8 | 88.4 | 94.4  |
| AMR | Peru                 | 66.0 | 83.0 | 54.8 | 39.4 | 88.3 | 94.2  |
| AMR | Mexico               | 73.0 | 76.0 | 55.5 | 38.0 | 87.7 | 93.5  |
| AMR | Bolivia              | 44.0 | 83.0 | 36.5 | 54.0 | 84.3 | 90.5  |
| AMR | Suriname             | 58.0 | 76.0 | 44.1 | 45.8 | 84.0 | 89.9  |
| AMR | Haiti                | 41.0 | 69.0 | 28.3 | 53.4 | 76.0 | 81.7  |
| EMR | Bahrain              | 99.0 | 99.0 | 98.0 | 2.0  | 94.9 | 100.0 |
| EMR | Morocco              | 99.0 | 99.0 | 98.0 | 2.0  | 94.9 | 100.0 |
| EMR | Oman                 | 99.0 | 99.0 | 98.0 | 2.0  | 94.9 | 100.0 |
| EMR | United Arab Emirates | 99.0 | 99.0 | 98.0 | 2.0  | 94.9 | 100.0 |
| EMR | Iran                 | 98.0 | 99.0 | 97.0 | 3.0  | 94.9 | 100.0 |
| EMR | Qatar                | 95.0 | 99.0 | 94.1 | 5.9  | 94.8 | 100.0 |
| EMR | Kuwait               | 94.0 | 99.0 | 93.1 | 6.9  | 94.7 | 99.9  |
| EMR | Saudi Arabia         | 96.0 | 96.0 | 92.2 | 7.7  | 94.6 | 99.8  |
| EMR | Jordan               | 96.0 | 93.0 | 89.3 | 10.4 | 94.4 | 99.7  |
| EMR | Egypt                | 94.0 | 94.0 | 88.4 | 11.3 | 94.3 | 99.6  |
| EMR | Tunisia              | 93.0 | 91.0 | 84.6 | 14.7 | 94.0 | 99.4  |
| EMR | Libya                | 72.0 | 94.0 | 67.7 | 30.6 | 92.5 | 98.3  |
| EMR | Iraq                 | 86.0 | 85.0 | 73.1 | 24.8 | 92.3 | 97.9  |
| EMR | Sudan                | 74.0 | 90.0 | 66.6 | 30.8 | 91.6 | 97.4  |
| EMR | Djibouti             | 81.0 | 81.0 | 65.6 | 30.8 | 90.6 | 96.4  |
| EMR | Lebanon              | 63.0 | 82.0 | 51.7 | 41.7 | 87.4 | 93.3  |
| EMR | Pakistan             | 71.0 | 76.0 | 54.0 | 39.1 | 87.2 | 93.0  |
| EMR | Syrian Arab Republic | 54.0 | 67.0 | 36.2 | 48.6 | 79.1 | 84.8  |
| EMR | Yemen                | 46.0 | 65.0 | 29.9 | 51.2 | 75.5 | 81.1  |
| EMR | Afghanistan          | 39.0 | 64.0 | 25.0 | 53.1 | 72.5 | 78.0  |
| EMR | Somalia              |      | 46.0 | 0.0  | 46.0 | 42.3 | 46.0  |
| EUR | Hungary              | 99.0 | 99.0 | 98.0 | 2.0  | 94.9 | 100.0 |
| EUR | Turkmenistan         | 99.0 | 99.0 | 98.0 | 2.0  | 94.9 | 100.0 |
| EUR | Uzbekistan           | 99.0 | 99.0 | 98.0 | 2.0  | 94.9 | 100.0 |
| EUR | Kazakhstan           | 98.0 | 99.0 | 97.0 | 3.0  | 94.9 | 100.0 |
| EUR | Azerbaijan           | 97.0 | 98.0 | 95.1 | 4.9  | 94.8 | 99.9  |
| EUR | Belarus              | 98.0 | 97.0 | 95.1 | 4.9  | 94.8 | 99.9  |
| EUR | Russian Federation   | 97.0 | 98.0 | 95.1 | 4.9  | 94.8 | 99.9  |
| EUR | Tajikistan           | 97.0 | 98.0 | 95.1 | 4.9  | 94.8 | 99.9  |
| EUR | Andorra              | 95.0 | 99.0 | 94.1 | 5.9  | 94.8 | 100.0 |
| EUR | Israel               | 96.0 | 98.0 | 94.1 | 5.8  | 94.7 | 99.9  |
| EUR | Portugal             | 96.0 | 98.0 | 94.1 | 5.8  | 94.7 | 99.9  |
| EUR | Slovakia             | 98.0 | 96.0 | 94.1 | 5.8  | 94.7 | 99.9  |
| EUR | Kyrgyzstan           | 98.0 | 95.0 | 93.1 | 6.8  | 94.7 | 99.9  |
| EUR | Spain                | 94.0 | 98.0 | 92.1 | 7.8  | 94.7 | 99.9  |
| EUR | Georgia              | 97.0 | 95.0 | 92.2 | 7.7  | 94.6 | 99.9  |

|      |                                                            |      |      |      |      |      |       |
|------|------------------------------------------------------------|------|------|------|------|------|-------|
| EUR  | Sweden                                                     | 95.0 | 97.0 | 92.2 | 7.7  | 94.6 | 99.9  |
| EUR  | Albania                                                    | 96.0 | 96.0 | 92.2 | 7.7  | 94.6 | 99.8  |
| EUR  | Armenia                                                    | 96.0 | 96.0 | 92.2 | 7.7  | 94.6 | 99.8  |
| EUR  | Latvia                                                     | 96.0 | 96.0 | 92.2 | 7.7  | 94.6 | 99.8  |
| EUR  | Luxembourg                                                 | 90.0 | 99.0 | 89.1 | 10.8 | 94.6 | 99.9  |
| EUR  | Norway                                                     | 95.0 | 96.0 | 91.2 | 8.6  | 94.6 | 99.8  |
| EUR  | Germany                                                    | 93.0 | 97.0 | 90.2 | 9.6  | 94.5 | 99.8  |
| EUR  | Denmark                                                    | 90.0 | 97.0 | 87.3 | 12.4 | 94.3 | 99.7  |
| EUR  | Republic of Moldova                                        | 95.0 | 93.0 | 88.4 | 11.3 | 94.3 | 99.7  |
| EUR  | Iceland                                                    | 95.0 | 92.0 | 87.4 | 12.2 | 94.3 | 99.6  |
| EUR  | Finland                                                    | 93.0 | 94.0 | 87.4 | 12.2 | 94.2 | 99.6  |
| EUR  | Lithuania                                                  | 93.0 | 94.0 | 87.4 | 12.2 | 94.2 | 99.6  |
| EUR  | Slovenia                                                   | 94.0 | 93.0 | 87.4 | 12.2 | 94.2 | 99.6  |
| EUR  | Malta                                                      | 95.0 | 91.0 | 86.5 | 13.1 | 94.2 | 99.6  |
| EUR  | Poland                                                     | 92.0 | 94.0 | 86.5 | 13.0 | 94.2 | 99.5  |
| EUR  | Switzerland                                                | 90.0 | 95.0 | 85.5 | 14.0 | 94.1 | 99.5  |
| EUR  | Turkey                                                     | 88.0 | 96.0 | 84.5 | 15.0 | 94.1 | 99.5  |
| EUR  | Croatia                                                    | 95.0 | 89.0 | 84.6 | 14.9 | 94.0 | 99.5  |
| EUR  | Czechia                                                    | 84.0 | 97.0 | 81.5 | 18.0 | 94.0 | 99.5  |
| EUR  | Greece                                                     | 83.0 | 97.0 | 80.5 | 19.0 | 93.9 | 99.5  |
| EUR  | Belgium                                                    | 85.0 | 96.0 | 81.6 | 17.8 | 93.9 | 99.4  |
| EUR  | Estonia                                                    | 90.0 | 93.0 | 83.7 | 15.6 | 93.9 | 99.3  |
| EUR  | Netherlands                                                | 90.0 | 93.0 | 83.7 | 15.6 | 93.9 | 99.3  |
| EUR  | Austria                                                    | 84.0 | 96.0 | 80.6 | 18.7 | 93.8 | 99.4  |
| EUR  | Bulgaria                                                   | 87.0 | 94.0 | 81.8 | 17.4 | 93.7 | 99.2  |
| EUR  | Italy                                                      | 88.0 | 92.0 | 81.0 | 18.1 | 93.5 | 99.0  |
| EUR  | United Kingdom of<br>Great Britain and<br>Northern Ireland | 87.0 | 92.0 | 80.0 | 18.9 | 93.4 | 99.0  |
| EUR  | North Macedonia                                            | 94.0 | 83.0 | 78.0 | 21.0 | 93.4 | 99.0  |
| EUR  | Ukraine                                                    | 92.0 | 86.0 | 79.1 | 19.8 | 93.3 | 98.9  |
| EUR  | Cyprus                                                     | 88.0 | 90.0 | 79.2 | 19.6 | 93.3 | 98.8  |
| EUR  | Serbia                                                     | 91.0 | 86.0 | 78.3 | 20.5 | 93.2 | 98.7  |
| EUR  | France                                                     | 83.0 | 90.0 | 74.7 | 23.6 | 92.7 | 98.3  |
| EUR  | Monaco                                                     | 79.0 | 88.0 | 69.5 | 28.0 | 91.8 | 97.5  |
| EUR  | San Marino                                                 | 79.0 | 86.0 | 67.9 | 29.1 | 91.3 | 97.1  |
| EUR  | Romania                                                    | 76.0 | 86.0 | 65.4 | 31.3 | 90.9 | 96.6  |
| EUR  | Montenegro                                                 | 86.0 | 58.0 | 49.9 | 44.2 | 88.1 | 94.1  |
| EUR  | Bosnia and<br>Herzegovina                                  | 76.0 | 69.0 | 52.4 | 40.1 | 86.7 | 92.6  |
| EUR  | Ireland                                                    |      | 92.0 | 0.0  | 92.0 | 84.6 | 92.0  |
| SEAR | Maldives                                                   | 99.0 | 99.0 | 98.0 | 2.0  | 94.9 | 100.0 |
| SEAR | Sri Lanka                                                  | 99.0 | 99.0 | 98.0 | 2.0  | 94.9 | 100.0 |
| SEAR | Democratic People's<br>Republic of Korea                   | 98.0 | 99.0 | 97.0 | 3.0  | 94.9 | 100.0 |

|      |                                  |      |      |      |      |      |       |
|------|----------------------------------|------|------|------|------|------|-------|
| SEAR | Bangladesh                       | 95.0 | 97.0 | 92.2 | 7.7  | 94.6 | 99.9  |
| SEAR | Thailand                         | 87.0 | 99.0 | 86.1 | 13.7 | 94.5 | 99.9  |
| SEAR | Bhutan                           | 92.0 | 97.0 | 89.2 | 10.5 | 94.5 | 99.8  |
| SEAR | India                            | 84.0 | 90.0 | 75.6 | 22.8 | 92.8 | 98.4  |
| SEAR | Nepal                            | 76.0 | 90.0 | 68.4 | 29.2 | 91.8 | 97.6  |
| SEAR | Indonesia                        | 71.0 | 90.0 | 63.9 | 33.2 | 91.2 | 97.1  |
| SEAR | Myanmar                          | 80.0 | 83.0 | 66.4 | 30.2 | 90.9 | 96.6  |
| SEAR | Timor-Leste                      | 80.0 | 77.0 | 61.6 | 33.8 | 89.6 | 95.4  |
| WPR  | Niue                             | 99.0 | 99.0 | 98.0 | 2.0  | 94.9 | 100.0 |
| WPR  | Tonga                            | 99.0 | 99.0 | 98.0 | 2.0  | 94.9 | 100.0 |
| WPR  | China                            | 98.0 | 99.0 | 97.0 | 3.0  | 94.9 | 100.0 |
| WPR  | Mongolia                         | 98.0 | 99.0 | 97.0 | 3.0  | 94.9 | 100.0 |
| WPR  | Cook Islands                     | 98.0 | 98.0 | 96.0 | 3.9  | 94.8 | 100.0 |
| WPR  | Brunei Darussalam                | 98.0 | 97.0 | 95.1 | 4.9  | 94.8 | 99.9  |
| WPR  | Republic of Korea                | 96.0 | 97.0 | 93.1 | 6.8  | 94.7 | 99.9  |
| WPR  | Japan                            | 93.0 | 97.0 | 90.2 | 9.6  | 94.5 | 99.8  |
| WPR  | Fiji                             | 94.0 | 96.0 | 90.2 | 9.5  | 94.5 | 99.8  |
| WPR  | Nauru                            | 95.0 | 95.0 | 90.3 | 9.5  | 94.5 | 99.8  |
| WPR  | Viet Nam                         | 92.0 | 97.0 | 89.2 | 10.5 | 94.5 | 99.8  |
| WPR  | Australia                        | 94.0 | 95.0 | 89.3 | 10.4 | 94.4 | 99.7  |
| WPR  | Tuvalu                           | 92.0 | 95.0 | 87.4 | 12.2 | 94.3 | 99.6  |
| WPR  | New Zealand                      | 90.0 | 93.0 | 83.7 | 15.6 | 93.9 | 99.3  |
| WPR  | Palau                            | 88.0 | 93.0 | 81.8 | 17.3 | 93.7 | 99.2  |
| WPR  | Singapore                        | 84.0 | 95.0 | 79.8 | 19.4 | 93.7 | 99.2  |
| WPR  | Malaysia                         | 87.0 | 93.0 | 80.9 | 18.2 | 93.6 | 99.1  |
| WPR  | Kiribati                         | 91.0 | 81.0 | 73.7 | 24.6 | 92.6 | 98.3  |
| WPR  | Cambodia                         | 82.0 | 84.0 | 68.9 | 28.2 | 91.4 | 97.1  |
| WPR  | Marshall Islands                 | 64.0 | 83.0 | 53.1 | 40.8 | 88.0 | 93.9  |
| WPR  | Solomon Islands                  | 54.0 | 84.0 | 45.4 | 47.3 | 86.6 | 92.6  |
| WPR  | Micronesia                       | 52.0 | 76.0 | 39.5 | 49.0 | 82.6 | 88.5  |
| WPR  | Lao People's Democratic Republic | 57.0 | 72.0 | 41.0 | 46.9 | 82.2 | 88.0  |
| WPR  | Philippines                      | 40.0 | 73.0 | 29.2 | 54.6 | 78.0 | 83.8  |
| WPR  | Vanuatu                          |      | 80.0 | 0.0  | 80.0 | 73.6 | 80.0  |
| WPR  | Samoa                            | 44.0 | 58.0 | 25.5 | 51.0 | 71.1 | 76.5  |
| WPR  | Papua New Guinea                 | 20.0 | 38.0 | 7.6  | 42.8 | 46.6 | 50.4  |

AFR: African region; AMR: American region; EMR: Eastern Mediterranean region; EUR: European region; SEAR: South-East Asia region; WPR: Western Pacific region

Table S2: Pertussis vaccination coverage and pertussis protection in countries of the world in 2019: 1) vaccination coverage with the first (DTP1), second (DTP2) and third (DTP3) doses of pertussis vaccine ; 2) vaccination coverage with one, two and three doses of DTP vaccine in the target vaccination population; 3) pertussis protection in terms of prevalence of individuals with vaccine-induced pertussis protection in the target vaccination population; and 4) vaccination coverage with one, two or three doses of DTP vaccine

| Region | Country name                     | Vaccination coverage (%) |               |              | Vaccination coverage (%) |         |        | Pertussis protection (%) | Vaccination coverage (%) with one, two or three doses |
|--------|----------------------------------|--------------------------|---------------|--------------|--------------------------|---------|--------|--------------------------|-------------------------------------------------------|
|        |                                  | DTP1 vaccine             | DTP2* vaccine | DTP3 vaccine | 3 doses                  | 2 doses | 1 dose |                          |                                                       |
| AFR    | Algeria                          | 96.0                     | 93.5          | 91.0         | 81.7                     | 17.2    | 1.1    | 82.5                     | 100.0                                                 |
| AFR    | Angola                           | 67.0                     | 62.0          | 57.0         | 23.7                     | 44.0    | 26.9   | 69.7                     | 94.6                                                  |
| AFR    | Benin                            | 84.0                     | 80.0          | 76.0         | 51.1                     | 38.6    | 9.5    | 78.3                     | 99.2                                                  |
| AFR    | Botswana                         | 98.0                     | 96.5          | 95.0         | 89.8                     | 9.8     | 0.3    | 83.2                     | 100.0                                                 |
| AFR    | Burkina Faso                     | 95.0                     | 93.0          | 91.0         | 80.4                     | 18.2    | 1.3    | 82.4                     | 100.0                                                 |
| AFR    | Burundi                          | 97.0                     | 95.0          | 93.0         | 85.7                     | 13.6    | 0.7    | 82.9                     | 100.0                                                 |
| AFR    | Cabo Verde                       | 96.0                     | 96.0          | 96.0         | 88.5                     | 11.1    | 0.5    | 83.1                     | 100.0                                                 |
| AFR    | Cameroon                         | 75.0                     | 71.0          | 67.0         | 35.7                     | 44.0    | 17.9   | 74.4                     | 97.6                                                  |
| AFR    | Central African Republic         | 69.0                     | 58.0          | 47.0         | 18.8                     | 43.3    | 31.0   | 67.4                     | 93.1                                                  |
| AFR    | Chad                             | 65.0                     | 57.5          | 50.0         | 18.7                     | 42.6    | 31.3   | 66.9                     | 92.6                                                  |
| AFR    | Comoros                          | 96.0                     | 93.5          | 91.0         | 81.7                     | 17.2    | 1.1    | 82.5                     | 100.0                                                 |
| AFR    | Congo                            | 82.0                     | 80.5          | 79.0         | 52.1                     | 37.9    | 9.2    | 78.4                     | 99.3                                                  |
| AFR    | Côte d'Ivoire                    | 98.0                     | 91.0          | 84.0         | 74.9                     | 23.2    | 1.9    | 81.9                     | 100.0                                                 |
| AFR    | Democratic Republic of the Congo | 66.0                     | 61.5          | 57.0         | 23.1                     | 43.9    | 27.4   | 69.4                     | 94.4                                                  |
| AFR    | Equatorial Guinea                | 77.0                     | 65.0          | 53.0         | 26.5                     | 45.7    | 24.0   | 71.6                     | 96.2                                                  |
| AFR    | Eritrea                          | 97.0                     | 96.0          | 95.0         | 88.5                     | 11.1    | 0.5    | 83.1                     | 100.0                                                 |
| AFR    | Eswatini                         | 96.0                     | 93.0          | 90.0         | 80.4                     | 18.3    | 1.3    | 82.4                     | 100.0                                                 |
| AFR    | Ethiopia                         | 80.0                     | 74.5          | 69.0         | 41.1                     | 42.8    | 14.5   | 76.1                     | 98.4                                                  |
| AFR    | Gabon                            | 77.0                     | 73.5          | 70.0         | 39.6                     | 43.1    | 15.5   | 75.6                     | 98.2                                                  |
| AFR    | Gambia                           | 93.0                     | 90.5          | 88.0         | 74.1                     | 23.4    | 2.4    | 81.7                     | 99.9                                                  |
| AFR    | Ghana                            | 97.0                     | 97.0          | 97.0         | 91.3                     | 8.5     | 0.3    | 83.3                     | 100.0                                                 |
| AFR    | Guinea                           | 62.0                     | 54.5          | 47.0         | 15.9                     | 40.9    | 34.1   | 64.9                     | 90.8                                                  |
| AFR    | Guinea-Bissau                    | 85.0                     | 84.5          | 84.0         | 60.3                     | 33.2    | 6.1    | 79.8                     | 99.6                                                  |
| AFR    | Kenya                            | 97.0                     | 94.5          | 92.0         | 84.3                     | 14.8    | 0.8    | 82.7                     | 100.0                                                 |
| AFR    | Lesotho                          | 92.0                     | 89.5          | 87.0         | 71.6                     | 25.3    | 2.9    | 81.4                     | 99.9                                                  |
| AFR    | Liberia                          | 94.0                     | 84.0          | 74.0         | 58.4                     | 35.4    | 5.9    | 79.8                     | 99.8                                                  |
| AFR    | Madagascar                       | 85.0                     | 82.0          | 79.0         | 55.1                     | 36.4    | 7.9    | 79.0                     | 99.4                                                  |
| AFR    | Malawi                           | 97.0                     | 96.0          | 95.0         | 88.5                     | 11.1    | 0.5    | 83.1                     | 100.0                                                 |
| AFR    | Mali                             | 82.0                     | 79.5          | 77.0         | 50.2                     | 39.0    | 10.0   | 78.1                     | 99.2                                                  |
| AFR    | Mauritania                       | 89.0                     | 85.0          | 81.0         | 61.3                     | 32.8    | 5.6    | 80.0                     | 99.7                                                  |

|     |                             |      |      |      |      |      |      |      |       |
|-----|-----------------------------|------|------|------|------|------|------|------|-------|
| AFR | Mauritius                   | 97.0 | 96.5 | 96.0 | 89.9 | 9.8  | 0.4  | 83.2 | 100.0 |
| AFR | Mozambique                  | 93.0 | 90.5 | 88.0 | 74.1 | 23.4 | 2.4  | 81.7 | 99.9  |
| AFR | Namibia                     | 92.0 | 89.5 | 87.0 | 71.6 | 25.3 | 2.9  | 81.4 | 99.9  |
| AFR | Niger                       | 92.0 | 86.5 | 81.0 | 64.5 | 30.8 | 4.5  | 80.5 | 99.8  |
| AFR | Nigeria                     | 65.0 | 61.0 | 57.0 | 22.6 | 43.7 | 27.9 | 69.0 | 94.1  |
| AFR | Rwanda                      | 99.0 | 98.5 | 98.0 | 95.6 | 4.4  | 0.1  | 83.7 | 100.0 |
| AFR | Sao Tome and Principe       | 97.0 | 96.0 | 95.0 | 88.5 | 11.1 | 0.5  | 83.1 | 100.0 |
| AFR | Senegal                     | 97.0 | 95.0 | 93.0 | 85.7 | 13.6 | 0.7  | 82.9 | 100.0 |
| AFR | Seychelles                  | 99.0 | 99.0 | 99.0 | 97.0 | 2.9  | 0.0  | 83.8 | 100.0 |
| AFR | Sierra Leone                | 95.0 | 95.0 | 95.0 | 85.7 | 13.5 | 0.7  | 82.9 | 100.0 |
| AFR | South Africa                | 84.0 | 80.5 | 77.0 | 52.1 | 38.1 | 9.1  | 78.4 | 99.3  |
| AFR | South Sudan                 | 51.0 | 50.0 | 49.0 | 12.5 | 37.5 | 37.5 | 61.5 | 87.5  |
| AFR | Togo                        | 90.0 | 87.0 | 84.0 | 65.8 | 29.7 | 4.4  | 80.7 | 99.8  |
| AFR | Uganda                      | 99.0 | 96.0 | 93.0 | 88.4 | 11.2 | 0.4  | 83.1 | 100.0 |
| AFR | United Republic of Tanzania | 91.0 | 90.0 | 89.0 | 72.9 | 24.3 | 2.7  | 81.5 | 99.9  |
| AFR | Zambia                      | 94.0 | 91.0 | 88.0 | 75.3 | 22.5 | 2.1  | 81.8 | 99.9  |
| AFR | Zimbabwe                    | 94.0 | 92.0 | 90.0 | 77.8 | 20.4 | 1.7  | 82.1 | 100.0 |
| AMR | Antigua and Barbuda         | 99.0 | 97.0 | 95.0 | 91.2 | 8.5  | 0.2  | 83.3 | 100.0 |
| AMR | Argentina                   | 91.0 | 88.5 | 86.0 | 69.3 | 27.1 | 3.5  | 81.1 | 99.9  |
| AMR | Bahamas                     | 91.0 | 88.5 | 86.0 | 69.3 | 27.1 | 3.5  | 81.1 | 99.9  |
| AMR | Barbados                    | 92.0 | 91.0 | 90.0 | 75.3 | 22.4 | 2.2  | 81.8 | 99.9  |
| AMR | Belize                      | 99.0 | 98.5 | 98.0 | 95.6 | 4.4  | 0.1  | 83.7 | 100.0 |
| AMR | Bolivia                     | 81.0 | 78.0 | 75.0 | 47.4 | 40.3 | 11.3 | 77.5 | 99.0  |
| AMR | Brazil                      | 81.0 | 77.0 | 73.0 | 45.5 | 41.1 | 12.2 | 77.1 | 98.8  |
| AMR | Canada                      | 94.0 | 92.5 | 91.0 | 79.1 | 19.3 | 1.5  | 82.2 | 100.0 |
| AMR | Chile                       | 99.0 | 97.5 | 96.0 | 92.7 | 7.2  | 0.2  | 83.5 | 100.0 |
| AMR | Colombia                    | 92.0 | 92.0 | 92.0 | 77.9 | 20.3 | 1.8  | 82.1 | 99.9  |
| AMR | Costa Rica                  | 96.0 | 95.5 | 95.0 | 87.1 | 12.3 | 0.6  | 83.0 | 100.0 |
| AMR | Cuba                        | 99.0 | 99.0 | 99.0 | 97.0 | 2.9  | 0.0  | 83.8 | 100.0 |
| AMR | Dominica                    | 99.0 | 99.0 | 99.0 | 97.0 | 2.9  | 0.0  | 83.8 | 100.0 |
| AMR | Dominican Republic          | 99.0 | 94.0 | 89.0 | 82.8 | 16.4 | 0.8  | 82.6 | 100.0 |
| AMR | Ecuador                     | 85.0 | 85.0 | 85.0 | 61.4 | 32.5 | 5.7  | 80.0 | 99.7  |
| AMR | El Salvador                 | 82.0 | 81.5 | 81.0 | 54.1 | 36.9 | 8.4  | 78.8 | 99.4  |
| AMR | Grenada                     | 96.0 | 94.0 | 92.0 | 83.0 | 16.0 | 1.0  | 82.6 | 100.0 |
| AMR | Guatemala                   | 92.0 | 88.5 | 85.0 | 69.2 | 27.2 | 3.4  | 81.1 | 99.9  |
| AMR | Guyana                      | 99.0 | 99.0 | 99.0 | 97.0 | 2.9  | 0.0  | 83.8 | 100.0 |
| AMR | Haiti                       | 75.0 | 63.0 | 51.0 | 24.1 | 45.3 | 26.0 | 70.5 | 95.5  |
| AMR | Honduras                    | 90.0 | 88.5 | 87.0 | 69.3 | 27.1 | 3.5  | 81.1 | 99.9  |
| AMR | Jamaica                     | 97.0 | 96.5 | 96.0 | 89.9 | 9.8  | 0.4  | 83.2 | 100.0 |
| AMR | Mexico                      | 84.0 | 83.0 | 82.0 | 57.2 | 35.1 | 7.2  | 79.3 | 99.5  |
| AMR | Nicaragua                   | 99.0 | 98.5 | 98.0 | 95.6 | 4.4  | 0.1  | 83.7 | 100.0 |
| AMR | Panama                      | 96.0 | 92.0 | 88.0 | 77.7 | 20.6 | 1.6  | 82.1 | 100.0 |

|     |                                  |      |      |      |      |      |      |      |       |
|-----|----------------------------------|------|------|------|------|------|------|------|-------|
| AMR | Paraguay                         | 88.0 | 87.0 | 86.0 | 65.8 | 29.5 | 4.4  | 80.6 | 99.8  |
| AMR | Peru                             | 97.0 | 92.5 | 88.0 | 79.0 | 19.6 | 1.4  | 82.3 | 100.0 |
| AMR | Saint Kitts and Nevis            | 99.0 | 97.5 | 96.0 | 92.7 | 7.2  | 0.2  | 83.5 | 100.0 |
| AMR | Saint Lucia                      | 99.0 | 95.5 | 92.0 | 87.0 | 12.5 | 0.5  | 83.0 | 100.0 |
| AMR | Saint Vincent and the Grenadines | 99.0 | 98.0 | 97.0 | 94.1 | 5.8  | 0.1  | 83.6 | 100.0 |
| AMR | Suriname                         | 81.0 | 79.0 | 77.0 | 49.3 | 39.4 | 10.4 | 77.9 | 99.1  |
| AMR | Trinidad and Tobago              | 97.0 | 95.0 | 93.0 | 85.7 | 13.6 | 0.7  | 82.9 | 100.0 |
| AMR | United States of America         | 97.0 | 95.5 | 94.0 | 87.1 | 12.4 | 0.6  | 83.0 | 100.0 |
| AMR | Uruguay                          | 99.0 | 96.5 | 94.0 | 89.8 | 9.9  | 0.3  | 83.2 | 100.0 |
| AMR | Venezuela                        | 85.0 | 74.5 | 64.0 | 40.5 | 43.8 | 14.3 | 76.2 | 98.6  |
| EMR | Afghanistan                      | 73.0 | 69.5 | 66.0 | 33.5 | 44.3 | 19.4 | 73.7 | 97.2  |
| EMR | Bahrain                          | 99.0 | 99.0 | 99.0 | 97.0 | 2.9  | 0.0  | 83.8 | 100.0 |
| EMR | Djibouti                         | 90.0 | 87.5 | 85.0 | 66.9 | 28.8 | 4.1  | 80.8 | 99.8  |
| EMR | Egypt                            | 96.0 | 95.5 | 95.0 | 87.1 | 12.3 | 0.6  | 83.0 | 100.0 |
| EMR | Iran                             | 99.0 | 99.0 | 99.0 | 97.0 | 2.9  | 0.0  | 83.8 | 100.0 |
| EMR | Iraq                             | 93.0 | 88.5 | 84.0 | 69.1 | 27.4 | 3.4  | 81.1 | 99.9  |
| EMR | Jordan                           | 90.0 | 89.5 | 89.0 | 71.7 | 25.2 | 3.0  | 81.4 | 99.9  |
| EMR | Kuwait                           | 99.0 | 95.0 | 91.0 | 85.6 | 13.8 | 0.6  | 82.9 | 100.0 |
| EMR | Lebanon                          | 96.0 | 89.5 | 83.0 | 71.3 | 25.9 | 2.7  | 81.5 | 99.9  |
| EMR | Libya                            | 74.0 | 73.5 | 73.0 | 39.7 | 43.0 | 15.5 | 75.6 | 98.1  |
| EMR | Morocco                          | 99.0 | 99.0 | 99.0 | 97.0 | 2.9  | 0.0  | 83.8 | 100.0 |
| EMR | Oman                             | 99.0 | 99.0 | 99.0 | 97.0 | 2.9  | 0.0  | 83.8 | 100.0 |
| EMR | Pakistan                         | 86.0 | 80.5 | 75.0 | 51.9 | 38.3 | 9.1  | 78.5 | 99.3  |
| EMR | Qatar                            | 99.0 | 98.5 | 98.0 | 95.6 | 4.4  | 0.1  | 83.7 | 100.0 |
| EMR | Saudi Arabia                     | 96.0 | 96.0 | 96.0 | 88.5 | 11.1 | 0.5  | 83.1 | 100.0 |
| EMR | Somalia                          | 52.0 | 47.0 | 42.0 | 10.3 | 35.2 | 39.8 | 59.2 | 85.2  |
| EMR | Sudan                            | 97.0 | 95.0 | 93.0 | 85.7 | 13.6 | 0.7  | 82.9 | 100.0 |
| EMR | Syrian Arab Republic             | 72.0 | 63.0 | 54.0 | 24.5 | 44.8 | 26.0 | 70.4 | 95.2  |
| EMR | Tunisia                          | 97.0 | 94.5 | 92.0 | 84.3 | 14.8 | 0.8  | 82.7 | 100.0 |
| EMR | United Arab Emirates             | 99.0 | 99.0 | 99.0 | 97.0 | 2.9  | 0.0  | 83.8 | 100.0 |
| EMR | Yemen                            | 81.0 | 77.0 | 73.0 | 45.5 | 41.1 | 12.2 | 77.1 | 98.8  |
| EUR | Albania                          | 99.0 | 99.0 | 99.0 | 97.0 | 2.9  | 0.0  | 83.8 | 100.0 |
| EUR | Andorra                          | 99.0 | 99.0 | 99.0 | 97.0 | 2.9  | 0.0  | 83.8 | 100.0 |
| EUR | Armenia                          | 96.0 | 94.0 | 92.0 | 83.0 | 16.0 | 1.0  | 82.6 | 100.0 |
| EUR | Austria                          | 90.0 | 87.5 | 85.0 | 66.9 | 28.8 | 4.1  | 80.8 | 99.8  |
| EUR | Azerbaijan                       | 96.0 | 95.0 | 94.0 | 85.7 | 13.6 | 0.7  | 82.9 | 100.0 |
| EUR | Belarus                          | 98.0 | 98.0 | 98.0 | 94.1 | 5.8  | 0.1  | 83.6 | 100.0 |
| EUR | Belgium                          | 99.0 | 98.5 | 98.0 | 95.6 | 4.4  | 0.1  | 83.7 | 100.0 |
| EUR | Bosnia and Herzegovina           | 89.0 | 81.0 | 73.0 | 52.6 | 38.3 | 8.5  | 78.7 | 99.4  |



|     |                     |      |      |      |      |      |     |      |       |
|-----|---------------------|------|------|------|------|------|-----|------|-------|
| EUR | Bulgaria            | 94.0 | 93.0 | 92.0 | 80.4 | 18.2 | 1.4 | 82.4 | 100.0 |
| EUR | Croatia             | 98.0 | 96.0 | 94.0 | 88.4 | 11.1 | 0.4 | 83.1 | 100.0 |
| EUR | Cyprus              | 98.0 | 97.0 | 96.0 | 91.3 | 8.5  | 0.3 | 83.3 | 100.0 |
| EUR | Czechia             | 99.0 | 98.0 | 97.0 | 94.1 | 5.8  | 0.1 | 83.6 | 100.0 |
| EUR | Denmark             | 97.0 | 97.0 | 97.0 | 91.3 | 8.5  | 0.3 | 83.3 | 100.0 |
| EUR | Estonia             | 92.0 | 91.5 | 91.0 | 76.6 | 21.4 | 2.0 | 82.0 | 99.9  |
| EUR | Finland             | 98.0 | 94.5 | 91.0 | 84.3 | 15.0 | 0.8 | 82.8 | 100.0 |
| EUR | France              | 99.0 | 97.5 | 96.0 | 92.7 | 7.2  | 0.2 | 83.5 | 100.0 |
| EUR | Georgia             | 99.0 | 96.5 | 94.0 | 89.8 | 9.9  | 0.3 | 83.2 | 100.0 |
| EUR | Germany             | 98.0 | 95.5 | 93.0 | 87.0 | 12.4 | 0.5 | 83.0 | 100.0 |
| EUR | Greece              | 99.0 | 99.0 | 99.0 | 97.0 | 2.9  | 0.0 | 83.8 | 100.0 |
| EUR | Hungary             | 99.0 | 99.0 | 99.0 | 97.0 | 2.9  | 0.0 | 83.8 | 100.0 |
| EUR | Iceland             | 97.0 | 94.0 | 91.0 | 83.0 | 16.1 | 0.9 | 82.6 | 100.0 |
| EUR | Ireland             | 98.0 | 96.0 | 94.0 | 88.4 | 11.1 | 0.4 | 83.1 | 100.0 |
| EUR | Israel              | 99.0 | 98.5 | 98.0 | 95.6 | 4.4  | 0.1 | 83.7 | 100.0 |
| EUR | Italy               | 95.0 | 95.0 | 95.0 | 85.7 | 13.5 | 0.7 | 82.9 | 100.0 |
| EUR | Kazakhstan          | 99.0 | 98.0 | 97.0 | 94.1 | 5.8  | 0.1 | 83.6 | 100.0 |
| EUR | Kyrgyzstan          | 99.0 | 97.0 | 95.0 | 91.2 | 8.5  | 0.2 | 83.3 | 100.0 |
| EUR | Latvia              | 99.0 | 99.0 | 99.0 | 97.0 | 2.9  | 0.0 | 83.8 | 100.0 |
| EUR | Lithuania           | 96.0 | 94.0 | 92.0 | 83.0 | 16.0 | 1.0 | 82.6 | 100.0 |
| EUR | Luxembourg          | 99.0 | 99.0 | 99.0 | 97.0 | 2.9  | 0.0 | 83.8 | 100.0 |
| EUR | Malta               | 98.0 | 98.0 | 98.0 | 94.1 | 5.8  | 0.1 | 83.6 | 100.0 |
| EUR | Monaco              | 99.0 | 99.0 | 99.0 | 97.0 | 2.9  | 0.0 | 83.8 | 100.0 |
| EUR | Montenegro          | 94.0 | 90.0 | 86.0 | 72.8 | 24.6 | 2.6 | 81.6 | 99.9  |
| EUR | Netherlands         | 98.0 | 96.0 | 94.0 | 88.4 | 11.1 | 0.4 | 83.1 | 100.0 |
| EUR | North Macedonia     | 98.0 | 95.0 | 92.0 | 85.7 | 13.7 | 0.6 | 82.9 | 100.0 |
| EUR | Norway              | 99.0 | 98.0 | 97.0 | 94.1 | 5.8  | 0.1 | 83.6 | 100.0 |
| EUR | Poland              | 98.0 | 96.5 | 95.0 | 89.8 | 9.8  | 0.3 | 83.2 | 100.0 |
| EUR | Portugal            | 99.0 | 99.0 | 99.0 | 97.0 | 2.9  | 0.0 | 83.8 | 100.0 |
| EUR | Republic of Moldova | 91.0 | 91.0 | 91.0 | 75.4 | 22.4 | 2.2 | 81.8 | 99.9  |
| EUR | Romania             | 94.0 | 91.0 | 88.0 | 75.3 | 22.5 | 2.1 | 81.8 | 99.9  |
| EUR | Russian Federation  | 97.0 | 97.0 | 97.0 | 91.3 | 8.5  | 0.3 | 83.3 | 100.0 |
| EUR | San Marino          | 90.0 | 89.0 | 88.0 | 70.5 | 26.2 | 3.2 | 81.3 | 99.9  |
| EUR | Serbia              | 99.0 | 98.0 | 97.0 | 94.1 | 5.8  | 0.1 | 83.6 | 100.0 |
| EUR | Slovakia            | 99.0 | 98.0 | 97.0 | 94.1 | 5.8  | 0.1 | 83.6 | 100.0 |
| EUR | Slovenia            | 98.0 | 96.5 | 95.0 | 89.8 | 9.8  | 0.3 | 83.2 | 100.0 |
| EUR | Spain               | 98.0 | 97.0 | 96.0 | 91.3 | 8.5  | 0.3 | 83.3 | 100.0 |
| EUR | Sweden              | 98.0 | 98.0 | 98.0 | 94.1 | 5.8  | 0.1 | 83.6 | 100.0 |
| EUR | Switzerland         | 98.0 | 97.0 | 96.0 | 91.3 | 8.5  | 0.3 | 83.3 | 100.0 |
| EUR | Tajikistan          | 98.0 | 97.5 | 97.0 | 92.7 | 7.1  | 0.2 | 83.5 | 100.0 |
| EUR | Turkey              | 99.0 | 99.0 | 99.0 | 97.0 | 2.9  | 0.0 | 83.8 | 100.0 |
| EUR | Turkmenistan        | 99.0 | 99.0 | 99.0 | 97.0 | 2.9  | 0.0 | 83.8 | 100.0 |
| EUR | Ukraine             | 92.0 | 86.0 | 80.0 | 63.3 | 31.6 | 4.8 | 80.4 | 99.8  |

|      |                                                      |      |      |      |      |      |      |      |       |
|------|------------------------------------------------------|------|------|------|------|------|------|------|-------|
| EUR  | United Kingdom of Great Britain and Northern Ireland | 97.0 | 95.0 | 93.0 | 85.7 | 13.6 | 0.7  | 82.9 | 100.0 |
| EUR  | Uzbekistan                                           | 96.0 | 96.0 | 96.0 | 88.5 | 11.1 | 0.5  | 83.1 | 100.0 |
| SEAR | Bangladesh                                           | 99.0 | 98.5 | 98.0 | 95.6 | 4.4  | 0.1  | 83.7 | 100.0 |
| SEAR | Bhutan                                               | 99.0 | 98.0 | 97.0 | 94.1 | 5.8  | 0.1  | 83.6 | 100.0 |
| SEAR | Democratic People's Republic of Korea                | 98.0 | 97.5 | 97.0 | 92.7 | 7.1  | 0.2  | 83.5 | 100.0 |
| SEAR | India                                                | 94.0 | 92.5 | 91.0 | 79.1 | 19.3 | 1.5  | 82.2 | 100.0 |
| SEAR | Indonesia                                            | 90.0 | 87.5 | 85.0 | 66.9 | 28.8 | 4.1  | 80.8 | 99.8  |
| SEAR | Maldives                                             | 99.0 | 99.0 | 99.0 | 97.0 | 2.9  | 0.0  | 83.8 | 100.0 |
| SEAR | Myanmar                                              | 93.0 | 91.5 | 90.0 | 76.6 | 21.4 | 2.0  | 82.0 | 99.9  |
| SEAR | Nepal                                                | 96.0 | 94.5 | 93.0 | 84.4 | 14.8 | 0.8  | 82.7 | 100.0 |
| SEAR | Sri Lanka                                            | 99.0 | 99.0 | 99.0 | 97.0 | 2.9  | 0.0  | 83.8 | 100.0 |
| SEAR | Thailand                                             | 99.0 | 98.0 | 97.0 | 94.1 | 5.8  | 0.1  | 83.6 | 100.0 |
| SEAR | Timor-Leste                                          | 92.0 | 87.5 | 83.0 | 66.8 | 29.0 | 4.0  | 80.8 | 99.8  |
| WPR  | Australia                                            | 98.0 | 96.5 | 95.0 | 89.8 | 9.8  | 0.3  | 83.2 | 100.0 |
| WPR  | Brunei Darussalam                                    | 99.0 | 99.0 | 99.0 | 97.0 | 2.9  | 0.0  | 83.8 | 100.0 |
| WPR  | Cambodia                                             | 94.0 | 93.0 | 92.0 | 80.4 | 18.2 | 1.4  | 82.4 | 100.0 |
| WPR  | China                                                | 99.0 | 99.0 | 99.0 | 97.0 | 2.9  | 0.0  | 83.8 | 100.0 |
| WPR  | Cook Islands                                         | 99.0 | 98.5 | 98.0 | 95.6 | 4.4  | 0.1  | 83.7 | 100.0 |
| WPR  | Fiji                                                 | 99.0 | 99.0 | 99.0 | 97.0 | 2.9  | 0.0  | 83.8 | 100.0 |
| WPR  | Japan                                                | 99.0 | 98.5 | 98.0 | 95.6 | 4.4  | 0.1  | 83.7 | 100.0 |
| WPR  | Kiribati                                             | 99.0 | 98.0 | 97.0 | 94.1 | 5.8  | 0.1  | 83.6 | 100.0 |
| WPR  | Lao People's Democratic Republic                     | 73.0 | 70.5 | 68.0 | 35.0 | 44.1 | 18.4 | 74.2 | 97.5  |
| WPR  | Malaysia                                             | 99.0 | 98.5 | 98.0 | 95.6 | 4.4  | 0.1  | 83.7 | 100.0 |
| WPR  | Marshall Islands                                     | 96.0 | 87.5 | 79.0 | 66.4 | 29.9 | 3.6  | 80.9 | 99.9  |
| WPR  | Micronesia                                           | 97.0 | 87.5 | 78.0 | 66.2 | 30.2 | 3.5  | 80.9 | 99.9  |
| WPR  | Mongolia                                             | 99.0 | 98.5 | 98.0 | 95.6 | 4.4  | 0.1  | 83.7 | 100.0 |
| WPR  | Nauru                                                | 99.0 | 97.5 | 96.0 | 92.7 | 7.2  | 0.2  | 83.5 | 100.0 |
| WPR  | New Zealand                                          | 94.0 | 93.0 | 92.0 | 80.4 | 18.2 | 1.4  | 82.4 | 100.0 |
| WPR  | Niue                                                 | 99.0 | 99.0 | 99.0 | 97.0 | 2.9  | 0.0  | 83.8 | 100.0 |
| WPR  | Palau                                                | 99.0 | 98.0 | 97.0 | 94.1 | 5.8  | 0.1  | 83.6 | 100.0 |
| WPR  | Papua New Guinea                                     | 44.0 | 39.5 | 35.0 | 6.1  | 28.4 | 43.5 | 52.6 | 78.0  |
| WPR  | Philippines                                          | 66.0 | 65.5 | 65.0 | 28.1 | 44.4 | 23.4 | 71.6 | 95.9  |
| WPR  | Republic of Korea                                    | 98.0 | 98.0 | 98.0 | 94.1 | 5.8  | 0.1  | 83.6 | 100.0 |
| WPR  | Samoa                                                | 86.0 | 72.0 | 58.0 | 35.9 | 45.8 | 16.6 | 75.3 | 98.4  |
| WPR  | Singapore                                            | 98.0 | 97.0 | 96.0 | 91.3 | 8.5  | 0.3  | 83.3 | 100.0 |
| WPR  | Solomon Islands                                      | 98.0 | 96.0 | 94.0 | 88.4 | 11.1 | 0.4  | 83.1 | 100.0 |
| WPR  | Tonga                                                | 99.0 | 99.0 | 99.0 | 97.0 | 2.9  | 0.0  | 83.8 | 100.0 |
| WPR  | Tuvalu                                               | 99.0 | 95.5 | 92.0 | 87.0 | 12.5 | 0.5  | 83.0 | 100.0 |
| WPR  | Vanuatu                                              | 95.0 | 92.5 | 90.0 | 79.1 | 19.4 | 1.5  | 82.2 | 100.0 |
| WPR  | Viet Nam                                             | 96.0 | 92.5 | 89.0 | 79.0 | 19.5 | 1.5  | 82.2 | 100.0 |

\* Vaccination coverage with DTP2 vaccine estimated from: (DTP1 + DTP3)/2

AFR: African region; AMR: American region; EMR: Eastern Mediterranean region; EUR: European region; SEAR: South-East Asia region; WPR: Western pacific region
